# Supplementary material for: Clinical dosage of lidocaine does not impact the biomedical outcome of sepsis-induced acute respiratory distress syndrome in a porcine model
Source: PeerJ. 2023 Aug 21;11:e15875. doi: 10.7717/peerj.15875 (PMC10448879; doi:10.7717/peerj.15875)
Supplement: Supplemental Information 1 [file peerj-11-15875-s001.xls]

## Sheet: Versuch
Lidocaine_septic ARDS			Weight_kg	Temp_PiCCO	Wet_weight_lung	Dry-weight_lung	WD_lung	Propofol	Fenta	Norepinephrine	G40	HF	RR_syst	RR_diast	RR_mean	ZVD	PA_syst	PA_diast	PA_mean	PCWP	FiO2	MV	CO2	AF	Peak	Pmean	PEEP	FRCI	FRCII	mean_FRC	CI	GEDI	EVLWI	SpO2	PaO2/FiO2	ph_art	pCO2_art	pO2_art	aSO2	BE	Potassium	Glucose	Lactate	Hb	ph_PA	pCO2_PA	pO2_PA	So2_PA	BE_PA
ARDS53-02		BLH	25	37.7				15	7	1	0	100	90	47	62	7	25	9	16	11	0.4	5.7	38.8	34	20	10	4	368	367	367.5	2.81	347	8	100	267.5	7.489	41.7	107	98.8	7.6	4.2	109	1.2	9	7.43	53.9	37.3	53.1	10.5
		T0	25	39.2				15	7	3	0	119	92	40	61	9	39	11	27	10	0.4	6.5	41.7	37	22	10	4	310	327	318.5	4.53	363	9	100	262.5	7.455	45.2	105	98.4	7.2	4.6	106	2	8.8	7.398	51.1	41.5	59.9	6.1
		T1	25	38.9				17	8	3	0	118	104	51	72	11	52	21	36	12	0.4	6.4	37.9	37	24	11	4	312	318	315	4.18	362	9	100	252.5	7.467	43.5	101	98	7	4.6	74	2.1	8.7	7.41	46.1	39.7	60.2	4.2
		T2	25	38.4				17	8	5	0	144	82	41	60	8	61	21	40	11	0.4	6.4	40.8	37	27	11	4	259	271	265	4.23	332	10	100	244	7.473	40.5	97.6	96.8	5.5	4.6	48	2.2	8.9	7.419	46.2	40.1	59.2	5
		T3	25	38.4				17	9	6	0	145	89	44	62	6	56	25	39	11	0.4	6.4	39.2	37	29	12	4	253	274	263.5	3.24	318	9	100	210.5	7.435	44.7	84.2	95.6	7.435	5.1	85	3.7	9.2	7.374	50.1	38	51.7	3.7
Groupe	Inhalation	T4	25	38.2				19	9	10	0	156	82	42	57	5	51	24	38	11	0.4	6.7	36.5	37	28	12	5	253	235	244	3.25	292	9	100	200.5	7.441	43.3	80.2	94.7	4.8	6	30	4.1	9.6	7.374	47	33	43.4	2
		T5	25	37.8				19	9	15	10	173	94	39	57	8	55	22	39	11	0.4	6.4	39.2	37	26	11	4	286	246	266	3.48	310	9	96	181.25	7.335	49.9	72.5	90.8	0.7	5.3	20	5	8.3	7.263	59.7	34.5	37.9	0.2
		T6	25	37.4				19	9	15	10	157	93	38	59	10	52	18	38	11	0.4	6.8	37	37	30	14	7	281	295	288	4.17	323	11	99	179.75	7.381	49.1	71.9	94.1	3.7	6.2	43	4.3	7	7.322	57.2	39.4	52.8	3.5
		T7	25	38.1				19	9	15	10	163	95	36	58	10	47	17	35	12	0.4	6.4	39.9	37	27	14	6	288	297	292.5	4.42	331	11	96	159	7.329	52.7	63.6	87.8	1.8	6.5	22.2	5	7.2	7.279	55.5	36.3	43.3	-0.4
		T8	25	38.9	77	14	5.5	19	9	15	10	162	86	33	53	9	41	15	30	11	0.5	6.8	43	39	27	14	6	230	251	240.5	4.63	333	11	99	140.8	7.302	55.9	70.4	91.2	1.4	6.4	61	4.7	7.3	7.241	58.2	39.1	47.2	-1.9
ARDS53-03		BLH	25	35.8				15	7	0	0	78	105	62	81	7	26	10	18	10	0.4	5.2	36	26	19	9	5	318	298	308	3.42	421	8	98	482.5	7.476	40.3	193	100	5.6	3.5	126	1.4	8.9	7.428	47.7	41.3	63.5	6.5
LPS Start:	1899-12-31 09:44:00	T0	25	38.1				15	7	0	0	98	102	46	68	9	41	19	31	10	0.4	5.8	42	28	22	10	5	344	294	319	4.18	458	10	99	375	7.417	44.9	150	99.9	4	3.9	122	2.5	9.4	7.372	50	44.4	65.4	3.5
		T1	25	39.4				17	8	0	0	162	48	46	63	8	52	28	40	8	0.4	7.6	42	36	25	11	5	235	236	235.5	4.99	413	12	100	277.5	7.412	43.9	111	98.6	3.1	4	96	3.8	8.8	7.354	50.3	42.8	60.9	2.3
		T2	25	39.8				17	8	4	0	158	84	44	62	8	51	27	39	12	0.4	7.6	37.7	36	28	12	5	224	217	220.5	4.7	395	12	100	295	7.492	38.2	118	100	5.3	4.7	69	3.5	7.7	7.431	46.3	38.2	58.5	6
Groupe	Inhalation	T3	25	39.1				17	9	4	15	140	107	52	72	8	50	25	38	8	0.4	7.6	31.2	36	29	12	5	193	166	179.5	4.89	432	12	100	317.5	7.513	36.8	127	100	6	5.2	64	3.4	7.7	7.45	43.3	35.8	56.5	5.6
		T4	25	38.5				19	9	4	20	140	85	40	57	9	49	25	37	7	0.4	7.3	30.8	34	28	12	5	207	207	207	4.54	420	12	100	267.5	7.499	35.7	107	100	4.1	5.2	69	3.2	7.4	7.446	36.6	39	61.6	0.9
		T5	25	38.2				19	9	7	30	146	97	41	62	9	45	21	35	8	0.4	6.9	35.6	32	27	11	5	221	211	216	5.42	450	13	99	199	7.446	41.6	79.6	98.5	4.2	5.6	92	3.8	7.6	7.407	46.9	39.2	61.2	4.5
		T6	25	37.8				19	9	7	30	156	94	40	62	10	46	20	34	12	0.4	6.9	36	32	27	12	5	221	196	208.5	5.9	463	14	95	171.25	7.423	43.9	68.5	94.3	3.9	5.7	99	3.8	7.4	7.38	49.1	40	61.2	3.7
		T7	25	38.5				19	9	7	30	149	91	39	60	12	42	20	32	12	0.5	6.7	37.8	30	31	15	7	353	266	309.5	5.12	461	14	95	150.6	7.391	46.5	75.3	96	3.1	6.1	93	3.1	7.1	7.353	51.1	39.7	57.3	2.8
		T8	25	38.3	75	14	5.35714	19	9	12	30	146	90	37	59	13	43	22	35	13	0.5	6.6	68.4	30	30	14	7	287	289	288	5.93	500	15	95	140.2	7.35	47.6	70.1	93.5	0.7	6	99	2.5	7	7.32	50.2	40	58.3	0.2
ARDS53-04		BLH	28	36.6				16	7	0	0	81	97	59	73	8	24	8	15	8	0.4	6	31.2	27	16	9	3	450	406	428	3.56	522	10	99	465	7.573	34.5	186	100	9	4	95	1	8.6	7.515	38.7	37.4	66.6	7.5
LPS Start:	1899-12-31 10:51:00	T0	28	38.4				19	7	0	0	100	100	54	71	12	42	20	31	11	0.4	6.1	41.4	27	20	10	5	358	360	359	4.2	517	11	99	395	7.472	40.6	158	100	5.6	3.9	114	1,7	8.9	7.416	45.4	41.5	64.3	4.2
		T1	28	38.5				19	7	0	0	115	95	51	67	13	48	26	36	11	0.4	6.8	39.9	29	25	11	4	366	339	352.5	4.57	515	12	99	345	7.478	40.8	138	100	6.1	4	89	2	9	7.416	48.8	42	67.1	6.3
		T2	28	38.7				19	7	3	0	127	86	42	59	9	55	25	37	10	0.4	6.8	41.6	29	28	12	4	305	293	299	5.88	552	14	98	245	7.462	42.5	98	98.1	8	4.5	86	2.3	9.6	7.417	48.1	45.1	71.7	5.9
Groupe	Lido i.v.	T3	28	38.5				21	8	5	5	119	90	49	66	11	49	28	33	12	0.4	6.8	37	29	31	12	5	332	290	311	3.88	481	14	100	224.25	7.46	39.3	89.7	97.1	3.8	4.8	92	3	10	7.402	44.5	39.9	62.3	2.7
		T4	28	37.7				21	8	5	5	120	82	41	58	10	48	25	36	14	0.4	6.8	36	29	29	12	5	311	272	291.5	4.64	496	15	96	241.75	7.35	42.5	96.7	96.6	-2	4.2	78	2.3	9.2	7.276	54.7	47.9	67.1	-1.2
		T5	28	37.4				21	8	9	5	133	91	40	62	9	47	20	32	10	0.4	6.9	35.7	29	29	12	5	312	284	298	5.65	536	16	93	169	7.43	41.4	67.6	91.6	2.9	4.4	80	2	9.2	7.399	46.3	42.6	67.3	3.4
		T6	28	38.4				21	8	9	5	146	87	40	60	11	42	19	26	12	0.4	6.9	38.5	29	32	15	8	380	331	355.5	5.66	50	16	96	193.75	7.437	42.5	77.5	94.2	4.1	5.1	81	1.8	9.4	7.392	46.4	43.7	68.5	3
		T7	28	38.8				21	8	9	5	154	82	40	62	11	39	18	27	9	0.4	7	36.1	29	30	14	8	392	373	382.5	5.69	466	16	98	193.25	7.438	43.1	77.3	94.4	4.6	5.4	82	1.5	9.3	7.401	45.7	43.3	68.9	3.3
		T8	28	38.4	59	12	4.91667	21	8	11	5	149	92	41	63	11	36	21	27	11	0.4	6.9	37.7	29	30	14	8	425	410	417.5	6.68	517	15	96	185.75	7.407	45.5	74.3	92.7	3.6	5.2	89	1.4	9.1	7.261	59.6	47.8	69.3	-0.2
ARDS53-5		BLH	28	37.4				14	6	0	0	90	101	64	80	8	23	8	15	11	0.4	5.8	36.8	26	18	9	5	559	482	520.5	2.89	470	10	100	485	7.537	34.7	194	100	6.3	3.5	97	1.2	8.8	7.457	48.7	31.6	50.1	9.6
LPS Start:	1899-12-31 10:19:00	T0	28	39.3				14	6	0	0	90	96	46	63	11	35	19	26	12	0.4	5.9	41.6	26	22	10	4	484	473	478.5	2.79	470	12	100	430	7.478	36.9	172	100	3.4	4	94	2.5	8.8	7.388	51.4	32.3	45.5	5.4
		T1	28	38.7				14	6	0	0	89	94	48	63	12	55	30	38		0.4	5.9	40.7	26	27	12	4	450	431	440.5	2.51	428	11	100	322.5	7.452	40.6	129	99.6	4	4.2	92	3.5	9.6	7.369	55	31.4	43	5.9
		T2	28	38.7				14	6	3	0	99	94	43	62	11	66	21	38	11	0.4	5.8	39.9	26	29	12	4	422	416	419	2.92	401	12	100	257.5	7.446	41.1	103	98.5	3.9	4.4	79	3.5	9.8	7.386	51.4	35.6	52.7	5.2
Groupe	Sham	T3	28	38.6				14	6	3	5	88	103	47	66	11	51	25	34	11	0.4	5.8	39.8	26	30	12	4	442	415	428.5	3	408	12	99	255	7.484	40.3	102	98.4	6.3	4.8	85	3.3	10.3	7.416	47.6	35.5	54.4	5.5
		T4	28	38.7				14	6	2.5	8	99	104	45	66	9	44	21	33	9	0.4	5.7	39.5	26	30	12	4	373	429	401	4.14	447	13	97	211.5	7.489	41.8	84.6	97.1	7.7	5.1	78	2.3	9.5	7.421	46.1	37.9	61.7	5.1
		T5	28	38.7				14	6	2.5	10	136	111	46	70	10	43	20	33	7	0.4	5.7	35.8	26	31	13	5	430	423	426.5	4.35	404	16	96	224.25	7.481	42.3	89.7	97.4	7.4	4.9	75	1.9	9.3	7.435	48.5	39.6	63	7.6
		T6	28	38.6				14	6	2.5	15	140	121	53	78	11	45	26	34	8	0.4	5.7	36.1	26	32	13	5	481	441	461	4.36	402	14	96	198.5	7.439	41.9	79.4	95.7	3.8	4.5	74	1.5	9.3	7.407	51.3	41.4	65.3	7
		T7	28	38.3				16	6	2.5	15	135	98	43	63	9	41	22	30	12	0.4	5.6	34.3	26	28	12	5	436	409	422.5	4.07	396	14	96	182.75	7.457	44.9	73.1	93.8	7.2	5	77	1.6	9.1	7.411	48.3	40	62.7	5.5
		T8	28	37.8	56	11	5.09091	16	6	2.5	15	132	110	46	73	11	43	22	31	11	0.4	5.7	35.6	26	31	12	5	484	413	448.5	4.51	452	15	94	177	7.43	46.3	70.8	92.7	5.9	4.8	79	1.9	8.8	7.388	50.8	40	61.5	5.2
ARDS53-06		BLH	26	36.9				14	7	0	0	96	111	61	83	5	28	11	18	10	0.4	6.1	35.1	30	19	9	5	350	365	357.5	3.85	406	8	100	472.5	7.525	37.2	189	100	7.3	3.7	90	1.4	9.4	7.473	42.7	39.8	68.1	7.1
LPS Start:	1899-12-31 10:08:00	T0	26	38.5				18	8	0	0	89	110	53	76	8	54	25	37	10	0.4	6.1	37.7	30	25	11	5	303	275	289	2.97	397	10	100	412.5	7.515	37.9	165	100	7	4.3	78	1.7	9.5	7.43	40.9	34	51.2	2.6
		T1	26	38.4				21	9	0	5	105	99	49	69	9	61	30	42	13	0.4	6.1	38.9	30	28	12	5	291	333	312	3.88	417	10	100	252.5	7.483	40.9	101	98.5	6.6	4.6	67	2	9.3	7.416	50.4	36.2	54.4	7.2
		T2	26	38.5				21	9	2	11	123	94	45	63	7	52	27	38	13	0.4	6.1	39.6	30	31	13	5	275	300	287.5	4.03	409	11	100	234.75	7.493	42.8	93.9	97.7	8.7	5	52	1.6	9.5	7.441	47.4	38.1	60.6	7.5
Groupe	Lido i.v.	T3	26	38.3				21	9	2	20	122	96	44	64	7	45	19	31	10	0.4	6.5	35.8	32	33	14	5	287	248	267.5	4.81	434	11	99	195.25	7.507	41.9	78.1	95.7	9.2	5.2	45	1.2	9.2	7.455	46.3	39.3	63.8	7.9
		T4	26	38.7				21	9	4	25	135	96	42	60	8	44	17	29	10	0.4	7	39	34	34	14	5	291	270	280.5	5.28	405	13	99	215.75	7.319	51.8	86.3	98.2	0.6	4.3	37	0.9	8.1	7.4	53.2	42.8	66.6	7.6
		T5	26	38.5				21	9	4	30	154	93	41	62	8	41	20	29	8	0.4	7.6	37	37	35	14	4	190	240	215	5.95	412	12	99	210	7.474	40.3	84	96.6	5.5	4.3	48	1.2	8.4	7.413	46	42.4	68.4	4.4
		T6	26	38.4				21	9	4	35	170	90	41	63	8	39	16	26	8	0.4	7.6	36	37	33	13	4	261	206	233.5	6.4	437	12	100	217.5	7.479	41.1	87	96.5	6.3	4.5	44	1	8.4	7.422	44.9	45.5	69.8	4.4
		T7	26	38.3				20	9	4	35	168	85	41	62	8	40	19	27	10	0.4	7.4	38.5	36	32	13	4	285	247	266	6.64	442	12	98	200.75	7.436	43.8	80.3	98.4	4.9	4.3	52	1.3	7.9	7.436	54.8	43.8	68.2	7
		T8	26	38.1	69	13	5.30769	20	8	4	35	152	96	42	66	10	43	33	37	n.b.	0.4	7.4	35.2	36	31	13	5	268	217	242.5	6.83	467	13	96	188.5	7.338	50.6	75.4	95.6	1.4	4.4	57	0.4	7.1	7.287	61.6	43.8	64.8	2.8
ARDS53-09		BLH	30	36.1				13	6	0		68	102	52	73	6	26	4	12	(-)	0.4	5.5	33.5	25	13	8	5	923	819	871	2.64	460	11	97	525	7.529	36.3	210	100	6.9	3.9	102	1.2	9.8	7.486	44.5	37	64.1	9.3
LPS Start:	1899-12-31 09:45:00	T0	30	37.1				15	7	0		74	99	51	76	11	38	5	20	(-)	0.4	5.5	41.2	25	16	8	5	818	820	819	3.24	504	11	95	492.5	7.475	40.8	197	100	5.9	3.8	106	1.9	10.2	7.425	49.7	41.1	67.6	7.5
		T1	30	38				15	7	0		84	101	50	72	12	38	6	21	(-)	0.4	5.5	44.4	25	18	9	5	705	660	682.5	2.97	488	11	96	362.5	7.425	45.3	145	100	4.9	4.3	86	1.9	9.8	7.378	55	37.8	59.1	6.7
		T2	30	38.3				15	7	0		99	91	44	62	10	45	6	28	(-)	0.4	6.4	39	29	21	10	5	594	616	605	3.09	465	12	97	307.5	7.482	40.6	123	99.1	6.3	4.8	72	1.8	10	7.428	51.8	38.5	63.9	9
Groupe	Inhalation	T3	30	38.4				15	7	2	10	109	101	51	69	11	51	24	38	(-)	0.4	6.4	38.2	29	24	10	5	532	513	522.5	3.12	471	14	96	245.75	7.459	39	98.3	97.9	3.5	4.2	65	2	10.6	7.409	44.8	39.3	66.9	3.4
		T4	30	38.6				15	7	0	30	116	104	56	73	11	48	6	28	(-)	0.4	6.4	42.7	29	24	10	5	566	559	562.5	3.46	520	16	95	240.75	7.4	45	96.3	97.4	2.8	4.7	80	2.7	10.2	7.344	53.2	42.3	64.9	2.9
		T5	30	38.7				15	7	0	30	128	104	52	71	11	47	6	30	(-)	0.4	8.1	40.1	31	24	11	5	446	444	445	(-)	(-)	(-)	92	205.5	7.423	42.1	82.2	96	2.7	5	79	1.8	10.1	7.38	50.9	40.9	64.9	4.5
		T6	30	38.6				15	7	0	30	138	100	47	67	11	52	3	29	(-)	0.4	8.1	39.1	31	25	11	5	427	440	433.5	3.35	492	18	89	178	7.41	43.7	71.2	92.6	2.7	5	81	1.8	10.2	7.352	52.8	37.5	57.3	3.3
		T7	30	38.6				15	7	1	30	133	91	42	65	12	48	8	24		0.4	8	39.9	31	28	14	8	465	466	465.5	3.11	503	19	90	172	7.378	46.8	68.8	91.2	2.1	5.4	82	1.8	10.5	7.326	59.9	36	48.1	4.7
		T8	30	38.5	124	18	6.88889	15	7	2	30	145	88	47	63	12	51	11	28		0.5	7.9	39.4	31	30	16	10	538	488	513	3.01	495	19	92	147.2	7.352	49	73.6	93	1.4	5.6	40	1.5	10.7	7.297	62.1	36.1	46.7	3.4
ARDS53-10		BLH	29	37.9				14	6	0	0	86	96	52	71	6	17	8	12	7	0.4	7.5	36	35	17	9	5	495	491	493	3.48	381	10	99	510	7.364	46.6	204	100	1.1	3.6	117	1.3	8.4	7.3	49.4	44.2	61.4	3.4
LPS Start:	1899-12-31 09:42:00	T0	29	38.6				16	7	0	0	96	92	37	60	9	35	18	25	11	0.4	7.5	37.3	35	21	10	5	410	404	407	3.7	371	12	99	422.5	7.473	38.1	169	100	3.9	4.1	133	2.2	9.4	7.411	46.8	38.1	56.7	4.7
		T1	29	38.4				20	8	0	0	98	96	45	63	10	49	27	35	10	0.4	7.5	33.6	35	27	12	4	342	291	316.5	3.53	355	12	98	209	7.445	41.9	83.6	96	4.3	4.4	95	2.5	9.7	7.403	48.3	37.8	52.7	4.9
		T2	29	38.1				20	8	3	0	116	91	42	62	9	51	28	35	10	0.4	7.4	34	35	30	12	5	270	279	274.5	4.08	375	14	95	181.75	7.459	40.3	72.7	92.2	4.3	4.9	65	2.5	10.1	7.413	47.2	38.9	56.6	5.1
Groupe	Sham	T3	29	38.2				20	8	6	10	130	93	45	65	9	52	25	36	8	0.4	7.5	35.7	35	33	15	7	343	346	344.5	4.48	362	14	93	175.5	7.449	40	70.2	91.2	3.4	5.1	68	3.1	10.3	7.409	47.1	39.4	58.2	4.7
		T4	29	38.4				20	8	6	20	138	97	49	68	10	55	29	38	8	0.5	7.4	35.6	35	31	15	8	300	306	303	4.86	414	14	92	160	7.241	53.1	80	90.9	-4.2	4.7	76	3	10	7.233	62.5	41.6	56.6	-1.2
		T5	29	38.7				20	8	6	25	152	95	49	68	10	50	30	37	10	0.6	8.1	35.2	38	34	17	10	332	317	324.5	3.93	342	16	92	116.5	7.376	45.8	69.9	89.4	1.4	5.5	91	3.2	10.2	7.325	53.9	37.6	49.5	1.8
		T6	29	38.8				20	8	6	25	152	97	48	69	10	47	26	34	11	0.7	8.2	34.6	38	33	17	10	368	365	366.5	3.85	332	16	93	99.5714	7.359	49.1	69.7	88.5	2	6	96	2.8	10.1	7.312	60.5	37	45.8	3.9
		T7	29	38.9				20	8	6	25	157	87	42	61	10	39	22	29	11	0.7	8.2	37	38	35	19	11	414	431	422.5	3.94	323	15	94	99.7143	7.348	52.9	69.8	88.3	3.1	6.3	99	2.5	10	7.294	63.6	37.3	43.5	3.9
		T8	29	38.8	114	18	6.33333	20	8	8	25	155	85	41	60	11	43	22	31	11	0.7	8.2	60.2	38	36	21	13	478	455	466.5	4.14	307	14	94	107.429	7.186	60.2	75.2	89.7	-4.9	4.9	86	1.7	8.2	7.177	74.9	39.7	45.2	-0.6
ARDS53-13		BLH	24	36.4				12	5	0	0	81	102	53	72	8	23	14	19	10	0.4	6.3	31	36	15	8	4	2042	2045	2043.5	3.05	392	14	98	487.5	7.549	33.2	195	100	5.9	3.8	91	0.9	8.4	7.508	32.5	48.9	83.8	2.3
LPS Start:	1899-12-31 10:00:00	T0	24	38.3				16	7	0	0	95	99	46	65	10	36	25	30	11	0.4	6.5	37.9	36	19	9	4	1960	1941	1950.5	3.79	407	13	96	397.5	7.488	38.7	159	100	5.4	4.1	89	1.1	8.6	7.442	43.9	42.1	67.2	5.4
		T1	24	37.9				18	8	0	0	97	94	45	62	11	44	31	37	17	0.4	6.9	34.3	38	24	11	5	1873	1910	1891.5	3.65	369	14	97	214.25	7.49	37.9	85.7	100	5	3.8	36	1.6	7.7	7.443	45.2	38.4	58.7	6.2
		T2	24	37.8				20	8	18	20	181	85	40	57	11	51	38	43	11	0.5	7	36.3	38	33	15	8	2278	2245	2261.5	4.72	287	18	90	120	7.355	40.9	60	85.9	-2.5	3.6	90	2.7	8.5	7.381	49.9	40.3	58.1	4.1
Groupe	Sham	T3	24	38.5				25	10	22	20	147	109	43	64	10	55	34	41	12	0.6	6.9	41.2	38	32	17	10	2109	2099	2104	4.68	409	16	94	128.833	7.33	47.2	77.3	92.4	-1	4.1	108	4.7	8.9	7.297	52.7	44.1	61.5	-0.6
		T4	24	38.6				25	10	14	20	126	117	45	66	12	47	28	35	12	0.7	7.5	38.9	40	30	16	10	nan	nan	#VALUE!	4.82	413	15	97	194.286	7.204	54.8	136	99.5	-5.7	3.6	96	4.2	8.6	7.192	63	51.5	68.8	-3.6
		T5	24	38.5				25	10	14	20	141	107	104	61	11	35	22	28	11	0.6	8.4	37.1	45	29	16	10	430	389	409.5	5.29	419	14	96	166.667	7.389	44.2	100	98.2	1.6	4.4	115	3.6	8.7	7.353	50.9	46.3	68	2.5
		T6	24	38.5				25	10	14	20	160	99	39	60	12	31	20	26	11	0.6	8.3	37.3	45	29	16	9	422	415	418.5	5.55	423	14	95	151.167	7.392	44.3	90.7	97.3	1.8	4.4	103	2.8	8.4	7.362	50.4	46.3	69.8	3
		T7	24	38.4				25	10	14	20	153	95	37	58	13	29	21	25	nan	0.6	8.3	36.7	45	28	16	10	398	417	407.5	5.15	418	16	95	149	7.403	43.5	89.4	96.8	2.2	4.5	110	2.3	8.2	7.363	48.9	45.4	68.1	2.3
		T8	24	38.1	90	17	5.29412	25	10	18	20	160	91	34	55	13	26	18	23	nan	0.6	8.3	36.7	45	28	16	10	385	401	393	6.19	456	15	95	166.667	7.258	47	100	100	-5.4	3.6	87	1.5	6.7	7.226	58.6	51.1	71.9	-2.9
ARDS53-14		BLH	28	36.4				11	5	0	0	77	100	52	72	9	28	13	19	12	0.4	6.4	31.6	34	13	7	5	623	644	633.5	3.09	419	10	99	557.5	7.563	33.3	223	100	7.1	3.8	114	1.4	9	7.389	51.5	40.1	63.6	5.6
LPS Start:	1899-12-31 09:37:00	T0	28	37.8				11	5	0	0	80	86	41	58	12	41	12	30	13	0.5	6.5	35.5	34	15	8	5	597	571	584	2.55	403	12	96	386	7.488	37.2	193	99.6	4.5	4.3	107	2.7	10.1	7.439	47	36.1	53.7	7
		T1	28	38.6				12	6	0	0	112	85	55	71	12	59	40	46	15	0.4	6.5	37.9	34	18	9	5	465	437	451	2.82	417	13	98	257.5	7.477	38.7	103	97.6	4.6	4.6	47	2.9	10	7.423	49.2	34.7	49.2	7.1
		T2	28	39				12	6	5	10	150	81	46	62	10	68	38	48	11	0.4	6.5	39.4	34	22	10	5	552	474	513	3.69	422	14	94	240.75	7.473	40.4	96.3	97	5.4	5.2	52	2.9	10.4	7.428	46.2	39.9	60	7.428
Groupe	Lido i.v.	T3	28	38.5				12	6	3	30	129	97	55	71	11	59	36	44	11	0.4	6.7	39.6	35	22	10	5	418	448	433	3.17	412	14	94	260	7.429	40.5	104	97.3	2.3	4.9	113	4.5	10.5	7.383	48.6	39.8	58.3	3.5
		T4	28	38				12	6	2	25	160	90	55	69	12	66	39	47	11	0.4	6.9	38.4	35	22	10	5	378	414	396	3.29	442	14	92	257.5	7.282	50.9	103	97.2	-2.5	4.4	83	3.1	9.7	7.303	56.8	40.9	56.1	1.6
		T5	28	38.5				12	6	20	25	187	107	58	79	12	70	39	51	12	0.5	6.8	41.3	35	26	13	8	391	400	395.5	3.92	433	15	90	156.6	7.376	49.3	78.3	92.7	3.3	5.2	99	2.5	10.9	7.334	53.9	41.4	57.2	2.4
		T6	28	39.2				12	6	35	25	176	117	53	76	12	49	30	38	12	0.6	7.9	42.2	40	28	15	10	338	383	360.5	3.87	418	17	92	195	7.343	45.8	117	97.9	-0.9	5	112	4.4	11.7	7.299	53.7	48	65	-0.2
		T7	28	39.4				12	6	28	25	173	96	47	68	12	43	22	30	13	0.6	8.9	38.5	45	26	15	10	365	363	364	3.87	386	16	93	195	7.363	42.7	117	98.1	-1.1	5.1	122	4.8	11.3	7.325	51.3	46.5	63.9	0.6
		T8	28	38.8	119	18	6.61111	12	6	28	25	167	98	42	67	14	41	21	29	13	0.6	8.9	37	45	24	14	9	354	358	356	4.81	425	16	94	185	7.346	43.6	111	97.7	-1.7	4.7	111	4	10.3	7.214	58.5	53	70.4	-3.9
ARDS53-17		BLH	27	36.4				12	7	0	0	53	80	32	47	2	20	6	12	6	0.4	6.3	34.8	35	13	7	5	715	783	749	2.37	383	10	97	565	7.459	37.6	226	100	2.5	4.3	nan	1	8.5	7.4	46.5	37.4	55.1	3.7
LPS Start:	1899-12-31 10:05:00	T0	27	36.7				13	7.5	0	0	62	91	40	58	4	31	14	22	6	0.4	6.4	37.1	35	14	8	4	626	652	639	2.65	379	11	96	547.5	7.461	37.6	219	100	2.7	4.2	82	1.5	8.6	7.377	47.6	39.6	54.6	2.5
		T1	27	37.2				13	7.5	2	10	90	101	40	59	3	42	19	29	6	0.4	6.9	39.5	37	17	9	4	568	595	581.5	3.92	419	13	98	432.5	7.405	41.8	173	100	1.3	4.5	85	2.3	8.9	7.345	48.7	52.9	76	0.9
		T2	27	38				15	7.5	2	15	93	91	40	56	3	48	21	31	5	0.4	6.9	38.5	37	19	9	5	493	527	510	3.51	376	13	98	355	7.44	39.1	142	100	2.2	4.6	94	2.4	9.3	7.383	45.6	41.1	45.6	1.9
Groupe	Sham	T3	27	38.3				15	7.5	2	15	87	92	40	56	3	40	15	27	5	0.4	6.8	37.5	37	19	9	5	444	466	455	3.38	399	12	95	397.5	7.452	37.2	159	100	1.8	4.9	103	2.6	9.6	7.387	44.5	47	71.6	1.6
		T4	27	38.3				15	7.5	3	15	105	97	42	58	3	43	14	30	4	0.4	7	39.5	37	21	10	4	473	422	447.5	4.09	411	12	96	355	7.422	40.1	142	100	1.5	5	102	2.7	9.4	7.377	47.7	44.6	68.1	2.6
		T5	27	38.3				15	7.5	3	15	126	97	41	58	2	45	22	32	4	0.4	7	37.9	37	21	10	5	441	444	442.5	4.95	536	11	98	285	7.396	43.6	114	99.1	1.7	5.1	97	2.2	9.3	7.351	49.1	45.2	66.5	1.4
		T6	27	38.4				15	7.5	3	15	123	95	41	58	2	43	24	32	3	0.4	7	39.9	37	21	10	4	295	453	374	4.09	410	12	99	270	7.378	45.2	108	97.8	1.4	5	95	1.7	9	7.333	52.6	43.8	60.8	1.8
		T7	27	38.4				15	7.5	3	15	123	98	38	57	2	39	19	31	3	0.4	7.5	38.3	40	20	10	5	418	430	424	4.49	401	12	98	260	7.383	47.3	104	98.4	2.9	5.3	94	1.4	8.7	7.345	53.2	42.4	60.3	3.1
		T8	27	38.3	48.6	14.6	3.32877	15	7.5	3	15	124	98	36	58	2	38	17	29	4	0.4	7.5	38.9	40	20	10	5			0	5.01	410	12	98	260	7.383	47.3	104	98.4	2.9	5.3	94	1.4	8.7	7.369	52.4	44.2	63.9	4.6
ARDS53-18		BLH	25	36.4				12	6	0	0	91	93	49	68	4	21	12	17	10	0.4	7.1	33	35	17	9	5	400	382	391	3.43	365	9	97	512.5	7.496	32.4	205	100	1.6	3.3	119	1	8.6	7.442	41.6	43.4	70	3.8
LPS Start:	1899-12-31 09:40:00	T0	25	37.6				12	6	0	0	95	97	50	70	8	39	24	31	8	0.4	7.1	38.4	35	25	12	5	320	301	310.5	3.43	353	10	94	352.5	7.43	41.3	141	100	2.8	4	97	1.9	9.2	7.364	51.1	41.6	59.9	3.4
		T1	25	38				14	7	0	0	106	98	53	71	8	43	28	35	9	0.4	7.6	34.8	37	31	13	4	303	290	296.5	3.31	351	10	90	233	7.4	38	93.2	97	2.4	4.1	79	2	9.1	7.389	46.4	38	56.5	2.8
		T2	25	38.4				14	7	0	10	123	91	51	66	7	54	34	41	10	0.4	7.7	34	37	34	14	4	308	309	308.5	3.06	340	11	97	201.75	7.47	37.2	80.7	95.7	3.1	4.7	88	2.3	9.5	7.395	47.5	35.8	50.9	3.8
Groupe	Inhalation	T3	25	38.6				14	7	0	10	137	83	48	62	8	55	39	45	9	0.4	7.7	31.6	37	35	14	4	250	229	239.5	2.75	329	12	93	194.75	7.457	36.7	77.9	94	1.9	5	64	2.6	9.9	7.414	47.9	35.8	48.7	5.6
		T4	25	38.6				14	7	0	20	157	112	64	88	8	57	36	44	9	0.4	7.8	34.4	37	40	18	8	276	249	262.5	3.58	385	13	92	173.75	7.434	39.4	69.5	91.7	1.9	5.4	101	2.2	9.8	7.267	58.8	37.5	46.5	-0.2
		T5	25	38.6				14	7	5	20	173	105	62	79	9	47	33	40	9	0.6	8.4	34.2	40	42	20	10	263	241	252	3.19	349	14	95	137.833	7.421	42.4	82.7	95	2.8	5.3	100	2	10.1	7.412	38.7	68.3	53.7	0
		T6	25	38.7				14	7	4	20	161	106	48	70	9	43	30	35	9	0.6	8.4	34.3	40	40	19	9	240	250	245	3.25	339	14	96	159.667	7.426	42.7	95.8	97.2	3.4	5.1	87	1.5	9.6	7.36	51.3	37.2	52.4	3.2
		T7	25	38.7				14	7	3	30	155	96	46	65	10	39	25	31	10	0.6	8.5	35.7	40	38	18	9	238	242	240	4.05	365	12	97	147.167	7.404	45.4	88.3	96.3	3.3	5	97	1.3	9	7.34	57.1	40.7	55	4.6
		T8	25	38.6	145	17.8	8.14607	14	7	3	30	160	86	36	58	11	38	23	30	10	0.6	8.6	35.6	40	37	18	9	215	243	229	436	360	11	97	149	7.366	49.7	89.4	96.3	2.9	5.1	94	1.1	8.4	7.366	60.9	49.2	66.6	0.4
ARDS53-20		BLH	28	37.7				12	7	0	0	86	92	46	63	4	19	12	15	9	0.4	7.6	35.7	34	13	8	5	683	723	703	3.98	550	11	98	517.5	7.476	34.3	207	100	1.5	4.1	104	4.3	8.8	7.443	42.3	40.4	63.4	4.4
LPS Start:	1899-12-31 10:00:00	T0	28	37.7				14	7	0	0	76	107	57	71	8	32	19	25	12	0.4	7.8	34.2	34	16	8	5	601	560	580.5	3.61	584	12	99	480	7.537	35.3	192	100	6.7	4.5	93	1.8	8.6	7.474	41.6	35.1	56.6	6.3
		T1	28	37.6				14	7	0	0	93	89	48	64	8	44	28	35	12	0.4	7.7	33.2	34	21	10	5	567	478	522.5	4.26	609	14	95	218	7.503	36.7	87.2	91.2	5.1	4.8	63	2.3	8.4	7.456	42.3	36.7	59.8	5.4
		T2	28	37.6				14	7	4	15	107	94	46	61	8	57	33	41	11	0.5	8	33.3	34	32	15	8	454	445	449.5	4.37	576	14	93	125.8	7.466	37.9	62.9	90.2	3.2	4.8	69	2.4	8.6	7.421	42.6	36.3	56.3	3
Groupe	Inhalation	T3	28	37.9				18	9	15	25	125	94	47	64	8	53	32	40	10	0.7	7.9	37.3	34	36	19	12	563	517	540	4.2	564	14	93	97.5714	7.348	45.1	68.3	88.8	-0.8	5	94	4.7	9.2	7.305	43.3	44.8	70.7	-4.4
		T4	28	37.8				18	9	12	30	123	107	51	69	9	60	33	42	12	0.8	8	37.7	34	36	21	14	733	765	749	4.58	585	16	95	108	7.297	52.3	86.4	93.7	-0.8	5.1	95	5	9.2	7.161	68	47.9	58.6	-4
		T5	28	38				18	9	6	30	131	92	44	61	9	56	35	42	10	0.8	8	40.2	34	34	20	14	833	863	848	4.41	578	16	94	108	7.359	54.2	86.4	94.3	4.7	4.9	93	3.6	8.8	7.302	62	41.2	55.4	4
		T6	28	38				18	9	8	30	137	90	42	60	10	51	33	41	10	0.8	9.5	36.4	34	34	20	14	732	693	712.5	4.72	575	17	95	100.25	7.393	52.1	80.2	94.2	6.4	4.8	84	2.4	8.5	7.345	60	40.6	58.3	6.6
		T7	28	38				18	9	9	30	136	91	42	62	10	47	33	39	10	0.8	9.4	36.7	40	34	20	14	611	598	604.5	4.49	539	15	95	99.125	7.43	50.4	79.3	94.8	8.4	5.2	90	1.7	8.7	7.362	60.8	39.1	56.4	8.4
		T8	28	38	128	21.3	6.00939	18	9	9	30	135	86	41	60	11	45	30	36	11	0.8	9.5	35.1	40	34	20	13	700	668	684	4.44	537	16	94	87.375	7.401	54.1	69.9	93.2	8.1	5.2	105	1.5	8.1	7.35	62.7	39.7	56.3	8.4
ARDS53-22		BLH	29	35.7				14	7	0.2	0	100	83	51	62	3	20	10	17	6	0.4	6.9	31.7	26	13	7	4	625	683	654	4.22	535	14	97	435	7.513	34.9	174	100	4.6	3.5	96	0.7	8.7	7.479	40	41.5	67.2	5.6
LPS Start:	1899-12-31 09:45:00	T0	29	37.7				14	7	0.2	0	90	100	58	75	9	43	26	34	10	0.4	6.9	39.2	26	15	8	4	598	588	593	3.98	576	12	94	370	7.47	40.3	148	100	5.2	4.2	104	1.5	8.9	7.396	46.7	36.1	54.7	3.5
		T1	29	38.2				18	7	2	0	135	100	53	73	8	55	33	40	8	0.4	8.2	39.7	32	20	9	5	543	513	528	5.74	553	12	96	244.5	7.437	43	97.8	98	4.4	4.4	92	1.9	9.1	7.392	49.8	43.4	66.2	5
		T2	29	38.2				26	12	20	10	209	85	44	58	8	62	37	45	12	0.6	8.6	36.5	34	32	16	10	587	503	545	5.77	529	15	82	100.5	7.403	43.4	60.3	85.9	2.1	4.4	94	2.7	9.5	7.375	50.2	37.3	54.1	3.8
Groupe	Lido i.v.	T3	29	38.2				22	15	44	10	215	83	42	58	9	56	38	45	12	0.8	8.8	41.7	34	34	20	13	795	745	770	4.61	466	16	94	178.75	7.324	48.1	143	100	-1	4.3	86	6.6	9.7	7.264	53.8	49.6	68.7	-2.4
		T4	29	38.4				22	15	44	20	227	83	43	57	9	53	36	43	12	0.7	9.8	38.3	38	32	19	14	717	705	711	3.92	447	18	95	184.286	7.401	44.4	129	99.5	2.5	4.4	97	8.6	9.8	7.332	51	43.6	63.9	1.1
		T5	29	38.6				22	15	60	20	240	78	38	53	8	50	31	39	10	0.7	10	36.4	38	24	14	9	541	524	532.5	4.12	428	19	93	131.714	7.441	41.7	92.2	97.1	3.9	4.2	99	9.9	9.8	7.378	51.5	39.7	58.3	4.7
		T6	29	38.9				22	15	80	20	240	85	36	51	9	42	29	36	10	0.7	9.9	37.2	38	26	15	9	nan	nan	#VALUE!	4.34	428	19	nan	126.714	7.425	43.6	88.7	96.5	3.8	4.3	108	12	9.8	7.352	53.1	39.1	57	3.6
		T7	29	39.5				22	15	120	20	250	92	34	51	9	42	27	34	9	0.7	9.9	39.4	38	27	15	9	494	435	464.5	4.44	410	19	nan	112.857	7.396	46.5	79	93.9	3.3	4.3	124	14.4	10.1	7.335	55.8	40.1	57.4	3.5
		T8	29	39.9	134	21.6	6.2037	22	15	120	10	250	91	34	51	9	39	23	30	11	0.7	10.2	35.5	38	28	15	9	485	485	485	3.94	388	17	nan	103.857	7.379	44.9	72.7	91.5	1.2	4.6	90	16	10.4	7.301	57.8	38.3	50.5	1.9
ARDS53-23		BLH	29	37.2				10	5	3	0	85	90	45	62	4	18	9	13	6	0.4	7.4	33.5	33	13	8	5	663	713	688	3.79	488	12	100	532.5	7.502	33.9	213	100	3.1	4	80	1	9.5	7.464	42.6	39.9	66.6	6.2
LPS Start:	1899-12-31 09:22:00	T0	29	38.2				18	9	0	0	82	104	56	74	6	27	16	21	8	0.4	7.6	36.3	33	15	8	5	620	594	607	3.56	541	14	99	520	7.512	35.1	208	100	4.7	4.5	79	1.6	9.5	7.459	42.6	34.9	57.1	5.9
		T1	29	38.1				20	10	3	0	95	90	41	94	7	29	16	22	7	0.4	7.4	35.5	33	17	9	5	625	555	590	4.65	530	14	99	452.5	7.481	36.9	181	100	3.7	4.6	57	2.2	9.5	7.437	42.1	40.4	65.7	3.9
		T2	29	38.4				26	13	5	5	108	81	37	55	7	36	18	25	6	0.4	7.4	37.8	33	20	10	5	587	577	582	4.64	492	14	98	397.5	7.47	36.5	159	100	2.9	4.6	78	2.2	9.9	7.437	42.9	41	67.3	4.3
Groupe	Inhalation	T3	29	38.4				26	14	8	5	152	72	42	59	6	28	17	22	5	0.4	7.5	38	33	21	10	5	600	545	572.5	5.44	470	15	99	342.5	7.474	36.1	137	100	2.7	5.2	81	2.5	10	7.431	42.1	44	71.9	3.3
		T4	29	38.6				22	14	10	10	132	84	45	66	6	30	15	22	5	0.4	7.8	37.1	33	21	10	5	533	510	521.5	6.07	508	16	98	362.5	7.485	34.3	145	100	2.2	5	94	2.2	9.9	7.43	41.8	45.2	73.6	3.1
		T5	29	38.7				22	14	10	10	138	81	40	59	5	25	13	19	5	0.4	8	36.6	33	21	10	5	577	586	581.5	5.67	498	15	98	342.5	7.454	37.7	137	100	2.3	4.7	98	1.7	9.7	7.419	43	42.5	70.1	3
		T6	29	38.9				16	9	12	10	150	81	40	60	6	22	12	17	6	0.4	8	36.9	33	22	10	5	549	591	570	5.63	477	16	97	335	7.457	37.7	134	100	2.5	4.8	95	1.5	9.4	7.426	41.4	44	72.4	2.6
		T7	29	38.9				16	9	12	10	153	84	38	59	7	31	13	22	6	0.4	8.1	36	33	22	10	5	538	560	549	5.84	489	15	98	317.5	7.463	37	127	100	2.4	4.7	93	1.3	9	7.428	43.1	42.6	70.5	3.8
		T8	29	38.9	89	17.6	5.05682	16	9	12	10	151	83	37	59	7	29	13	20	5	0.4	8.2	36.1	33	22	10	5	539	937	738	5.85	496	15	98	290	7.453	37.8	116	99.8	2.3	4.9	98	1.2	8.8	7.43	42.7	42.7	69.1	3.6
ARDS53-24		BLH	29	35.6				10	6	3	0	82	102	46	63	6	23	11	15	7	0.4	6.3	33.1	24	15	8	5	570	614	592	3.99	490	12	99	435	7.43	35.3	174	100	-0.9	3	99	1	9	7.39	39.5	43.2	70.7	-0.9
LPS Start:	1899-12-31 09:40:00	T0	29	36.6				16	8	1	0	76	103	53	72	7	32	16	22	10	0.4	6.3	39.3	24	17	9	5	540	516	528	4.09	540	14	100	470	7.4	39.9	188	100	-0.1	3.5	114	0.9	9.7	7.369	50.9	43.9	65.3	3.7
		T1	29	37.4				18	10	2	0	101	99	41	62	6	41	22	30	6	0.4	6.5	45.1	25	18	9	4	613	590	601.5	4.55	453	15	100	412.5	7.377	44.1	165	100	0.6	0.6	98	1.2	10.3	7.337	50.5	48.9	71.7	1.1
		T2	29	37.3				20	10	2	0	104	90	40	59	5	48	25	34	7	0.4	7.8	35.6	30	22	10	5	532	732	632	4.57	491	15	100	372.5	7.456	36.1	149	100	1.4	3.9	85	1.5	9.9	7.416	42.7	46.4	73.2	2.7
Groupe	Sham	T3	29	37.5				20	10	13	10	154	94	38	59	6	58	28	39	8	0.4	7.7	37.6	30	23	11	5	587	535	561	6.65	516	16	99	277.5	7.414	40.2	111	99	1	4.6	112	2.3	10.5	7.386	45.7	48.9	76.4	2.2
		T4	29	37.8				20	10	15	10	134	103	39	62	7	56	26	37	9	0.4	7.8	37.5	30	24	11	4	537	511	524	6.69	512	16	98	248	7.396	40.3	99.2	97.7	-0.2	4.3	122	2.8	10	7.396	38.8	51.4	77.9	-1
		T5	29	37.8				18	8	17	10	140	98	35	57	7	46	22	31	10	0.4	7.9	38.4	30	24	10	4	494	500	497	7.38	532	20	96	213	7.387	40.9	85.2	95.8	-0.4	4.2	122	2.3	9.9	7.364	45.6	49.8	75.4	0.5
		T6	29	37.8				18	8	33	10	147	104	33	60	8	46	18	30	9	0.4	7.9	37.7	30	25	11	5	414	497	455.5	7.45	513	19	95	194.5	7.371	41.4	77.8	93.9	-1.2	3.9	121	1.9	9.6	7.36	46.6	48	73.4	0.8
		T7	29	37.9				18	8	35	5	163	107	34	61	7	35	18	27	9	0.4	8	39.4	30	27	11	4	424	496	460	8.15	502	20	93	178.75	7.334	46.3	71.5	90.6	-1.2	4.2	140	2.9	10.3	7.318	49.7	4807	71.4	-0.6
		T8	29	37.8	114.5	22	5.20455	19	9	36	0	157	113	34	62	9	34	16	27	10	0.4	7.8	40.7	30	29	14	8	552	547	549.5	8.41	592	19	92	193	7.308	45.9	77.2	91.4	-3	4	131	3.7	9.9	7.287	52.3	49.6	70.5	-1.5
ARDS53-25		BLH	33	35.9				12	6	2	0	76	91	40	59	5	19	8	13	5	0.4	6.2	31.8	24	16	8	5	688	543	615.5	3.29	542	12	98	540	7.505	35.6	216	100	4.6	4.2	114	0.7	9.9	7.455	42.1	43.3	71.9	5.2
LPS Start:	1899-12-31 09:35:00	T0	33	36.6				15	8	0	0	63	88	43	60	4	27	10	17	6	0.4	6.3	35.3	24	18	9	5	508	501	504.5	2.89	585	13	94	517.5	7.493	36.7	207	100	4.4	4.3	118	1.1	9.8	7.436	44.8	37.2	58.4	5.4
		T1	33	37				18	10	0	0	83	95	46	66	5	32	15	24	13	0.4	6.7	37.3	24	23	10	5	254	232	243	3.68	564	13	97	382.5	7.44	40.9	153	99.9	3.3	4.3	111	1.7	9.5	7.401	47.8	41.9	65.4	4.5
		T2	33	37.3				18	10	1	0	95	90	43	60	3	42	20	32	4	0.4	7.3	34.5	26	28	12	6	375	370	372.5	4.2	586	14	95	255	7.467	38.6	102	98.5	3.8	4.7	94	2	9.8	7.441	42.2	43	68.9	4.2
Groupe	Inhalation	T3	33	37.8				24	15	16	5	154	91	42	62	2	53	26	36	3	0.4	7.2	39.1	26	28	12	5	448	464	456	5.73	570	14	94	204.25	7.413	43.2	81.7	94.8	2.7	5	115	2.2	10.5	7.395	46.7	46.5	71.6	3.3
		T4	33	37.7				24	15	20	5	140	100	41	63	3	58	27	39	3	0.4	8	36.8	28	28	12	4	443	378	410.5	6.26	630	15	97	208.75	7.332	46.9	83.5	93.8	-1	4.4	113	2.6	10.4	7.33	51.5	46	69.4	1.1
		T5	33	37.8				24	15	28	5	153	97	38	59	3	46	22	32	10	0.4	8.5	36	30	28	12	5	417	399	408	6.55	647	16	96	188	7.429	39.8	75.2	93.9	1.8	4.6	111	2.4	10.3	7.402	45.7	45.3	70.5	3.3
		T6	33	38.2				20	15	34	5	155	103	37	61	3	38	18	26	4	0.4	8.6	36.8	30	28	12	5	419	394	406.5	6.61	623	16	94	181	7.413	41.8	72.4	92.2	1.9	4.8	111	2.6	10.2	7.389	45.7	43.5	67.6	2.3
		T7	33	38.4				20	15	40	5	151	106	36	61	5	34	13	23	2	0.5	8.5	38.2	30	31	15	8	558	530	544	6.68	630	16	95	162.6	7.394	44	81.3	94.6	1.8	4.9	114	2.5	10.3	7.375	48.9	45.8	68.8	3
		T8	33	38.5	93	23	4.04348	18	12	40	5	153	112	36	62	4	34	13	23	5	0.5	8.6	38.1	30	30	14	8	544	568	556	6.49	607	16	97	162.6	7.376	41.6	81.3	95.3	-0.7	4.4	105	2.1	9.4	7.357	48.4	46.2	69.2	1.5
ARDS53-27		BLH	28	36.8				10	7	0	0	83	77	43	57	7	25	11	18	10	0.4	7.4	37.3	30	13	8	5	539	507	523	3.72	505	12	100	487.5	7.48	38.3	195	100	4.5	3.6	84	0.5	8.7	7.437	46.7	41.4	64.9	6.7
LPS Start:	1899-12-31 09:02:00	T0	28	38				18	10	0	0	72	92	42	60	9	36	19	27	12	0.4	7.4	38.6	30	17	9	4	429	429	429	3.03	523	12	98	445	7.467	39.6	178	99.8	4.5	4.4	62	1.4	9.8	7.395	44.7	33.7	50.1	2.2
		T1	28	38.2				18	10	6	10	89	96	43	63	10	47	19	32	12	0.4	7.5	41.8	30	21	10	5	388	371	379.5	4.53	531	12	100	320	7.431	43.6	128	99.1	4.3	4.5	72	1.6	9.6	7.385	51.7	40.6	61.8	5.4
		T2	28	38.9				28	12	12	20	116	90	42	62	8	53	25	34	9	0.4	8.9	39.4	36	21	10	5	424	407	415.5	5.71	514	12	100	275	7.452	40.8	110	98.1	4.1	4.8	104	2.3	9.3	7.414	47.4	43.3	68.5	5.2
Groupe	Sham	T3	28	39				27	12	12	15	122	101	47	68	9	53	25	34	12	0.4	8.9	36.9	36	22	10	5	346	368	357	5.54	487	13	100	265	7.448	34.4	106	98.4	-0.3	4	87	2.3	8.5	7.425	41.1	42.7	69.7	2.3
		T4	28	39.2				22	10	8	15	146	89	46	65	9	46	24	33	10	0.4	9	37.5	36	22	10	5	380	352	366	6.64	503	14	100	255	7.341	42.5	102	100	-2.5	4.1	84	1.6	7.9	7.416	46.3	44.5	70.4	4.7
		T5	28	39.1				22	10	4	15	144	79	42	59	9	39	18	28	11	0.4	9	35.7	36	23	11	5	327	331	329	6.53	549	16	100	199.75	7.473	39.9	79.9	95.1	5.1	5.1	100	1.6	8.8	7.429	43.4	41.9	67.7	4
		T6	28	39				22	10	8	15	150	84	41	61	10	40	17	28	11	0.4	9.1	36.9	36	24	11	5	282	316	299	7.08	537	15	100	219.75	7.474	37	87.9	96	3.2	4.9	99	1.5	8.6	7.428	43.8	41.3	67.8	4.2
		T7	28	38.8				22	10	8	15	139	85	39	60	11	37	16	26	12	0.4	9.1	34.4	36	24	11	5	304	304	304	5.95	519	14	100	191	7.472	37.7	76.4	94.8	3.6	5.1	109	1.7	8.6	7.43	44.2	39.4	62.9	4.6
		T8	28	38.5	103.4	20	5.17	22	10	10	15	139	86	39	60	11	39	19	28	12	0.4	9.1	35.4	36	25	11	5	311	282	296.5	6.67	535	15	100	175.75	7.442	39.6	70.3	92.7	2.7	5.2	110	1.7	8.5	7.417	44.6	40.7	64.7	3.8
ARDS53-31		BLH	33	37.5				14	7	0	0	75	88	45	61	6	20	9	15	10	0.4	6.1	34.3	25	14	8	4	500	499	499.5	2.7	567	16	100	545	7.371	42.7	218	100	-0.5	4	78	0.6	7.7	7.309	55.2	34	45.2	1.5
LPS Start:	1899-12-31 09:50:00	T0	33	37.4				14	8	0	0	75	112	58	82	10	34	19	27	11	0.4	6.2	35	25	16	9	5	400	346	373	3.3	584	14	100	530	7.48	35.4	212	100	2.6	3.7	62	1.4	8.3	7.422	43.7	37.6	56.3	3.7
		T1	33	38				14	8	0	10	79	114	48	73	11	47	24	36	13	0.4	6.2	37.5	25	19	9	4	357	383	370	2.99	567	16	100	417.5	7.453	38.2	167	100	2.5	4.2	92	2.1	8.4	7.401	47	33.8	48.4	4.1
		T2	33	38				14	8	0	10	93	95	50	67	10	55	28	40	10	0.4	6.2	36.3	25	26	11	5	406	255	330.5	3.08	567	16	100	225.25	7.444	37.5	90.1	96.9	1.4	4.2	80	2.1	9	7.4	47.7	34.2	47.8	4.4
Groupe	Sham	T3	33	38				14	8	0	10	101	98	55	71	10	49	34	33	9	0.4	6.2	36.4	25	27	12	5	294	301	297.5	3.35	618	16	100	242.5	7.446	38.1	97	97.9	2	4.7	71	2.4	9.2	7.393	44.9	35.6	52.2	2.3
		T4	33	38				14	8	0	10	109	98	60	76	10	48	31	38	10	0.4	6.2	37	25	25	11	5	250	294	272	3.36	668	17	100	277.5	7.397	36.9	111	98.9	-2.1	3.9	51	1.8	8.5	7.263	58.1	36.6	47.9	-0.7
		T5	33	38.4				14	8	0	20	126	108	66	80	9	47	29	37	10	0.4	6.3	39.9	25	25	11	5	255	315	285	3.58	685	16	98	223.75	7.398	41.7	89.5	96.5	0.8	4.5	99	1.7	8.5	7.342	52.5	32.8	41.9	2.5
		T6	33	38.8				14	8	0	20	147	109	60	78	9	50	30	40	9	0.4	7	37.7	28	24	11	4	288	231	259.5	3.57	589	19	96	182.25	7.408	41.2	72.9	94.1	1.2	4.7	95	1.2	8.5	7.367	51.6	33.1	42.7	3.9
		T7	33	38.3				20	9	1	20	125	78	36	51	9	41	23	33	10	0.4	6.9	35	28	24	11	5	288	266	277	3.2	571	19	96	169.75	7.41	43.3	67.9	92.9	2.6	5.1	103	1.3	8.1	7.36	51	32.3	41.5	3.2
		T8	33	38.1	107	19.06	5.61385	20	14	3	20	133	106	50	73	10	42	22	33	10	0.5	6.9	36.4	28	26	14	7	428	358	393	3.76	562	19	98	164.4	7.389	43.1	82.2	97.9	0.9	4.5	103	1	7.9	7.357	50.9	37	37	2.8
ARDS53-32		BLH	30	36.9				12	5	0	0	67	82	43	57	5	19	9	14	11	0.4	5.4	34.8	24	13	7	5	793	775	784	3.32	569	13	100	542.5	7.467	36.6	217	100	2.4	3.4	73	0.4	7.3	7.355	50	40.3	60.7	2.3
LPS Start:	1899-12-31 09:32:00	T0	30	37.7				14	7	0	10	71	90	43	60	8	30	18	23	10	0.4	5.4	41.4	24	13	8	4	551	488	519.5	4.94	821	21	100	512.5	7.421	39.9	205	100	1.3	3.5	83	1.5	8.3	7.37	54.8	41.3	65.2	1.1
		T1	30	37.5				20	10	2	10	92	96	52	69	9	35	22	28	10	0.4	6.4	40	28	16	8	4	586	580	583	4.34	611	15	100	470	7.396	40.4	188	100	0	3.6	77	2.2	8.8	7.358	45.8	42.7	65.9	0.3
		T2	30	38.2				24	12	0	15	80	87	49	62	8	44	25	32	7	0.4	7.4	33.2	32	18	9	4	305	390	347.5	2.97	612	22	100	385	7.45	34	154	100	-0.4	3.7	104	3.6	8.6	7.391	42.3	34	50.5	0.7
Groupe	Lido i.v.	T3	30	37.7				18	10	3	15	91	85	43	56	7	48	25	32	7	0.4	7.4	33.8	32	19	9	4	517	435	476	4.01	617	20	100	340	7.437	35.9	136	100	0	4	102	4.5	8.9	7.39	42.5	42.5	66.9	0.4
		T4	30	37.7				18	10	8	15	111	87	42	57	9	45	23	32	9	0.4	7.4	33.8	32	20	10	5	460	472	466	5.27	630	20	100	317.5	7.299	43.1	127	99.1	-4.8	3.7	92	3.2	8.8	7.391	40.6	46.7	74.7	-0.3
		T5	30	37.5				18	8	12	15	133	83	40	58	8	45	25	33	7	0.4	7.4	33.5	32	21	10	5	404	341	372.5	5.58	623	19	99	265	7.465	36.8	106	99.2	2.4	3.8	108	3.6	8.8	7.44	40.7	45.4	74.9	3.2
		T6	30	37.5				16	8	12	15	124	89	42	62	8	39	20	30	7	0.4	7.4	33	32	21	10	5	345	357	351	6.02	693	22	100	272.5	7.468	36.2	109	99.2	2.2	3.7	113	3.5	8.4	7.435	39.7	44.2	74.6	2.2
		T7	30	38				16	8	12	15	131	98	42	63	8	38	20	28	7	0.4	7.4	33.6	32	21	10	5	328	296	312	6.5	687	22	100	252.5	7.469	36.4	101	98.7	2.4	3.7	103	3.2	8.2	7.43	39.5	44.9	75.2	1.7
		T8	30	37.9	98.4	15.3	6.43137	16	8	11	15	121	94	42	62	8	36	18	27	8	0.4	7.4	31.3	32	23	10	5	347	295	321	6.73	761	21	97	204.5	7.452	37.5	81.8	99.4	2	3.6	95	2.5	7.7	7.424	41.3	43	71.5	2.4
ARDS53-33		BLH	30	36.2				12	7	0	0	86	85	57	89	6	22	2	11	NaN	0.4	7.1	32.1	30	14	8	5	894	816	855	3.1	507	15	98	580	7.527	33.2	232	100	4.4	3.9	97	0.5	9.1	7.477	38.5	37.6	64.7	4.5
LPS Start:	1899-12-31 09:20:00	T0	30	36.9				12	7	0	0	90	88	58	70	8	29	19	24	9	0.4	6.8	33.3	26	14	8	5	791	801	796	3.33	659	12	96	567.5	7.503	34.6	227	100	3.7	3.8	97	0.8	10.2	7.471	37.7	39.6	68.1	3.5
		T1	30	37.3				16	9	0	0	64	89	49	65	9	34	22	28	12	0.4	6.9	34.5	26	16	8	4	730	395	562.5	3.29	633	16	99	535	7.504	34.8	214	100	3.9	4	70	1.4	9.6	7.458	39.4	39	65.9	3.7
		T2	30	37.7				16	9	2	10	82	87	45	60	8	41	24	31	10	0.4	6.9	36.4	26	17	9	4	638	646	642	3.81	618	15	99	487.5	7.497	36.4	195	100	4.5	4.6	86	1.5	10.1	7.453	39.3	44.5	72	3.3
Groupe	Lido i.v.	T3	30	37.8				20	12	20	10	133	91	41	61	8	45	25	33	7	0.4	6.9	40.6	26	18	9	4	605	674	639.5	6.34	648	17	99	415	7.458	37.7	166	100	2.6	4.4	105	1.5	10.2	7.432	40.3	54.6	83.2	2.4
		T4	30	38.1				26	13	18	10	125	98	43	64	10	44	26	33	10	0.4	6.9	41.7	26	17	9	5	681	629	655	6.45	673	16	98	417.5	7.415	39.8	167	100	0.9	4.2	112	1.7	9.6	7.389	42.7	51.5	79.5	0.7
		T5	30	38.4				20	10	13	10	124	91	43	62	10	40	23	31	10	0.4	6.9	41.5	26	18	9	5	647	753	700	6.27	641	15	98	367.5	7.427	38.6	147	100	1	4.3	119	1.5	9.5	7.409	42.8	51.8	79.2	2.2
		T6	30	38.5				20	10	9	10	122	87	42	60	10	33	17	27	10	0.4	6.9	40	26	18	9	5	579	690	634.5	5.91	675	16	97	342.5	7.436	38.7	137	99.7	1.7	4.4	106	1.3	9.2	7.393	41.6	51.5	80.9	0.4
		T7	30	38.3				20	10	10	10	122	88	42	61	10	32	15	24	10	0.4	6.9	39.1	26	18	9	4	623	620	621.5	5.64	681	16	97	322.5	7.437	38.4	129	100	1.5	4.6	103	1.2	8.7	7.414	41.1	49	78.4	1.6
		T8	30	37.8	95.4	18.4	5.18478	20	10	10	10	137	90	43	63	12	33	16	25	10	0.4	7	38.3	26	19	9	5	558	575	566.5	6.677	688	18	97	312.5	7.428	39.3	125	99.5	1.4	4.6	96	1.1	8.7	7.408	42.1	50.8	80	1.7
ARDS53-35		BLH	30	35.9				12	6	3	0	83	84	52	65	8	20	10	14	11	0.4	5.5	32.6	23	13	7	4	871	805	838	3.62	628	13	100	532.5	7.459	37	213	100	2.2	3.8	121	0.8	10.4	7.413	42.6	44.7	73.9	2.4
LPS Start:	1899-12-31 09:29:00	T0	30	36.3				12	6	0	0	64	86	59	71	8	26	14	20	11	0.4	5.5	33.7	23	15	8	4	813	801	807	3.02	557	14	100	532.5	7.463	36.3	213	100	2	3.8	123	0.9	10.1	7.425	42.3	44.1	72.8	3
		T1	30	36.7				18	10	2	0	103	88	51	70	9	32	18	24	11	0.4	5.5	38.2	23	16	8	4	659	675	667	3.41	565	16	100	415	7.417	40.4	166	100	1.4	4	117	1.4	10	7.367	44.7	44.9	71.4	0.2
		T2	30	37.1				18	10	1	0	86	86	49	64	7	36	22	27	10	0.4	5.5	37.7	23	18	8	4	718	656	687	3.36	551	15	100	440	7.421	41.4	176	100	2.2	4.3	107	1.6	10.6	7.379	46.2	46.2	73	1.8
Groupe	Lido i.v.	T3	30	37.8				18	10	3	5	107	85	41	58	6	33	17	24	8	0.4	6.7	35.1	28	17	9	5	737	702	719.5	4.58	562	16	100	445	7.478	35	178	100	2.2	4.4	107	1.9	10.8	7.444	40.2	50.7	81.6	3.2
		T4	30	37.5				18	10	7	5	114	92	41	60	8	31	16	22	7	0.4	6.7	33	28	17	9	5	654	575	614.5	5.43	585	16	100	415	7.415	34.8	166	99.7	-2.1	4	107	2.8	10.3	7.402	38.3	53.9	83.7	-0.9
		T5	30	37.3				18	8	8	5	120	83	37	57	7	24	14	19	7	0.4	6.7	33.4	28	18	9	5	625	628	626.5	5.57	585	17	100	360	7.45	35.7	144	99.5	0.8	4.7	113	3.2	10.3	7.423	39.6	54.8	83.9	1.3
		T6	30	37.1				18	8	12	5	119	93	40	60	7	22	14	18	7	0.4	6.7	32.8	28	18	9	5	585	601	593	5.83	596	17	100	337.5	7.442	36.6	135	99.4	0.7	4.8	130	3.1	10.2	7.413	38.5	56.2	83.9	0
		T7	30	37.7				18	8	12	5	129	87	39	59	8	21	14	18	7	0.4	6.7	35.6	28	19	9	5	585	559	572	5.78	598	16	100	312.5	7.432	36.5	125	99.1	0	4.6	133	2.7	9.9	7.413	38.3	57.3	83.6	-0.1
		T8	30	37.6	68.5	13.4	5.11194	18	8	12	5	134	96	41	65	8	30	19	25	7	0.4	6.7	34.9	28	19	9	5	581	550	565.5	6.56	619	16	100	372.5	7.422	37.9	149	99.5	0.2	4.3	114	2	10	7.394	42	56	84	0.7
ARDS53-36		BLH	29	34.7				12	7	0	0	66	87	43	60	3	RV21	RV0	8	na	0.4	7	28.4	27	14	8	5	627	621	624	3.37	665	12	100	560	7.53	34.2	224	100	5.3	3.7	76	0.7	9.1	7.478	40	44.1	77.7	5.6
LPS Start:	1899-12-31 09:31:00	T0	29	35				12	7	0	10	71	90	43	62	5	34	14	22	8	0.4	7.1	32.9	27	17	9	5	617	622	619.5	5.16	724	15	100	532.5	7.471	38.7	213	100	4.1	3.2	78	1.1	9.4	7.441	41.3	53.9	86.2	3.6
		T1	29	35.7				12	7	2	10	82	96	44	64	5	29	16	22	8	0.4	7.6	35.7	28	18	9	5	648	643	645.5	4.53	676	16	98	415	7.437	42.6	166	100	4.1	3.4	86	1.8	10.1	7.408	46.8	52.5	82.1	4.4
		T2	29	36.3				12	7	0	15	81	85	46	62	5	45	35	33	5	0.4	7.3	36.4	28	20	10	5	416	518	467	3.94	646	19	98	370	7.44	40.7	148	100	3.1	3.6	87	2.7	10.2	7.401	48	48.9	78.2	4.5
Groupe	Inhalation	T3	29	36.9				12	7	6	15	111	82	40	57	4	51	28	35	5	0.4	7.4	37.7	28	24	11	5	na	na	#VALUE!	5.04	619	17	97	241.5	7.394	43.7	96.6	97.4	1.6	3.7	97	3.1	10.8	7.404	44.5	62	86	2.8
		T4	29	37.6				12	7	15	20	112	79	36	61	5	57	30	38	6	0.4	7.3	40.9	28	23	11	5	na	na	#VALUE!	5.09	616	15	96	218.75	7.364	47.2	87.5	96	1.3	3.9	137	2.9	11.1	7.28	44.9	51.1	76.3	-5.2
		T5	29	37.6				12	7	15	15	116	91	42	60	5	51	26	34	4	0.4	7.3	39.6	28	23	11	5	na	na	#VALUE!	5.03	629	15	95	201.5	7.363	45.5	80.6	94.5	0.4	3.8	115	3.6	11.2	7.336	51	50	76.1	1.2
		T6	29	37.5				12	7	15	12	108	95	42	60	4	45	22	31	5	0.4	8.4	34.1	32	23	11	5	na	na	#VALUE!	5.17	644	21	94	184	7.398	41.6	73.6	93.3	0.7	4	111	3.9	11	7.375	45.2	48.4	76.7	1
		T7	29	37.4				12	7	15	12	112	95	40	59	4	37	19	27	5	0.4	8.4	34.9	32	23	11	5	na	na	#VALUE!	5.43	661	17	93	176.5	7.391	40.5	70.6	92.5	-0.4	3.8	109	3.7	10.8	7.378	45.8	47	73.9	1.6
		T8	29	37.4	81	16.2	5	12	7	20	12	114	98	40	60	5	36	18	26	5	0.4	8.4	36.2	32	26	13	8	na	na	#VALUE!	5.32	673	22	93	191	7.381	43.3	76.4	94	0.4	4.1	108	3.1	10.8	7.358	46.6	49.6	76.1	0.5
ARDS53-37		BLH	32	35.4				16	7	0	0	69	81	43	59	6	17	11	14	6	0.4	6.5	29.8	28	15	8	5	682	668	675	3.98	527	10	100	555	7.542	34	222	100	6.1	3.6	110	1.6	8.7	7.492	40.5	44.4	75.6	7
LPS Start:	1899-12-31 09:35:00	T0	32	36.6				16	7	0	0	69	91	43	62	8	22	12	16	6	0.4	5.7	36.4	25	15	8	5	602	626	614	4.48	622	11	100	532.5	7.498	36.6	213	100	4.7	3.4	103	1.5	8.9	7.445	42	49.7	76.2	4.4
		T1	32	37.7				16	7	0.5	0	75	94	47	64	12	27	21	24	10	0.4	5.8	40.4	25	17	9	4	547	550	548.5	3.8	630	12	100	420	7.445	39.5	168	100	2.8	3.5	101	2.4	8.8	7.395	46.9	45.3	68.7	3.5
		T2	32	38.4				16	7	0.5	0	96	88	45	61	10	35	23	29	6	0.4	5.7	42.6	25	19	9	4	431	483	457	4.99	636	13	100	400	7.444	41.7	160	100	4.1	3.9	93	2.7	9.2	7.406	45.5	48.3	76.5	3.6
Groupe	Lido i.v.	T3	32	37.7				18	7	1	5	101	84	41	57	9	37	20	28	1	0.4	6	39.8	26	21	10	5	517	517	517	5.13	601	13	100	330	7.447	39.4	132	99.4	2.9	3.7	89	2.8	9.3	7.414	46.7	51	78.1	4.9
		T4	32	37.8				18	7	1	4	98	89	46	62	10	42	23	31	1	0.4	6	37.5	26	22	10	5	513	462	487.5	5.18	638	14	100	315	7.425	41.2	126	98.8	2.4	3.8	89	2.7	9.4	7.405	46.3	51.5	79.5	3.9
		T5	32	36.2				18	7	1	4	101	86	43	60	9	39	22	30	2	0.4	6	36	26	22	10	5	463	464	463.5	5.85	655	15	100	297.5	7.443	41	119	99.3	3.5	4	93	2.7	9.4	7.414	45.2	52.7	81	4
		T6	32	37				18	7	2	10	110	88	42	60	9	35	19	27	2	0.4	6	38	26	23	11	5	457	421	439	6.09	622	13	99	267.5	7.443	40.1	107	97.9	3	4	91	2.3	9.1	7.413	46	50.4	79.4	4.3
		T7	32	37.5				18	7	5	15	115	96	43	64	9	35	18	26	2	0.4	6	39.8	26	24	11	5	391	428	409.5	6.89	685	14	98	201.25	7.422	44.4	80.5	95.2	4.1	4.4	110	2	9.3	7.4	47.7	49	76.9	4.3
		T8	32	37	67	15.4	4.35065	18	7	5	15	140	93	44	67	10	37	20	29	2	0.4	6	38.2	26	25	11	5	423	446	434.5	7.63	674	16	96	190	7.375	47.9	76	93	2.5	4.1	79	1.8	11.3	7.38	48.6	50.9	76.3	3.4
ARDS53-38		BLH	31	36.1				12	5	0	0	73	88	49	65	2	16	7	12	4	0.4	6.2	32.4	25	13	8	5	841	791	816	3.15	557	9	97	557.5	7.528	35.5	223	100	6.2	4.1	70	1.3	9.5	7.468	40.6	38.6	66.9	5.2
LPS Start:	1899-12-31 08:54:00	T0	31	36.8				12	5	0	10	75	108	52	75	5	28	18	21	8	0.4	6.3	35.9	25	15	8	5	704	697	700.5	4.54	627	11	95	515	7.517	36.5	206	100	6.1	3.6	56	0.8	9.1	7.477	41.2	44.2	77.6	6.3
		T1	31	37.5				15	7	0	10	77	100	49	70	6	34	22	28	8	0.4	6.5	38.1	25	18	9	4	561	601	581	4.37	679	16	96	362.5	7.478	39.6	145	99.2	5.3	3.7	60	1.5	9.1	7.442	42.9	42.7	71.3	4.7
		T2	31	38.1				15	7	0	20	98	94	49	66	6	43	28	34	8	0.4	6.6	39.5	25	21	10	5	581	540	560.5	4.47	625	14	96	255	7.472	39.8	102	97.7	5	3.9	86	1.7	9.2	7.435	45.3	43.6	72.5	5.6
Groupe	Sham	T3	31	38				15	7	0	20	95	89	51	65	6	45	30	35	6	0.4	6.6	37.7	25	22	10	5	561	621	591	3.88	662	15	96	215.5	7.467	40	86.2	99.5	4.7	4.1	87	1.9	9.4	7.424	44.5	42.2	67.6	4.3
		T4	31	38.5				15	7	0	20	108	86	50	64	7	49	30	36	6	0.4	6.6	40.8	25	22	10	5	515	490	502.5	3.61	655	17	95	202.25	7.406	44.9	80.9	93.2	3.2	4.3	87	2.1	9.5	7.284	59.9	40.9	58.6	1.4
		T5	31	37.8				15	7	3	20	125	88	47	63	6	44	28	35	7	0.4	7.5	35.9	28	24	10	5	481	527	504	3.25	558	21	92	160	7.449	41.2	64	88.8	4.1	4.3	86	2.2	9.6	7.417	44.6	38.5	60.6	3.8
		T6	31	38				15	7	3	20	131	80	41	55	8	40	31	35	7	0.4	7.2	37	28	26	5	8	540	482	511	4.18	646	19	94	196	7.441	43.2	78.4	97.5	4.8	4.6	91	2	9.5	7.409	44.5	43.1	68.6	3.2
		T7	31	38				15	7	14	20	150	93	45	66	8	45	26	36	6	0.5	7.2	38.3	28	28	13	6	569	533	551	5.15	661	18	93	166.6	7.285	54.8	83.3	93	-0.6	4.2	98	2.1	9.4	7.353	52.6	43.7	66.6	3.2
		T8	31	38.2	94.4	16.98	5.55948	15	7	14	20	151	95	46	68	8	40	27	32	7	0.5	7.2	40	28	28	15	10	nan	nan	#VALUE!	5.24	674	16	94	168.6	7.382	46.5	84.3	94.3	2.4	4.3	108	2.5	9.5	7.351	53.3	44.4	65.3	3.6
[truncated: 7 more columns]

## Sheet: Übersicht
	Inhalation			Perfusor			Kontrolle (Sham)			Ausschluss
	überlebt	tot		überlebt	tot		überlebt	tot
Summe	8	4		8	4		8	0		6
	3			4			5			1
	7			6			10			2
	9				11		13			8
		12		14			17			26
		15			16		24			29
	18				19		27			34
	20			22			31
		21			28		38
	23			32
	25			33
		30		35
	36			37
Dosis
200
150
100
75
